# Supplementary material for: Boronate based fluorescence (ESIPT) probe for peroxynitrite
Source: Royal Society of Chemistry journal article supplement (doi:10.1039/c6cc06829d), 2016-01-01

## Supplementary Information

### **Boronate based fluorescence (ESIPT) probe for peroxynitrite**

Adam C. Sedgwick,<sup>a</sup> Xiaolong Sun,<sup>a</sup> Gyoungmi Kim,<sup>b</sup> Juyoung Yoon,<sup>\*b</sup> Steven D. Bull<sup>\*a</sup> and Tony D. James<sup>\*a</sup>

<sup>a</sup> Department of Chemistry, University of Bath, BA2 7AY, UK. Email: S.D.Bull@bath.ac.uk, T.D.James@bath.ac.uk

<sup>b</sup> Department of Chemistry and Nano Science, Ewha Womans University, Seoul 120-750, Korea. E-mail: jyoona@ewha.ac.kr.

### **Content**

- 1. Preparation of ROS/RNS**
- 2. Fluorescence analysis**
- 3. UV analysis**
- 4. Cell images and viability**
- 5. Experimental**
- 6. NMR**

## 1. Preparation of ROS/RNS

### **NO•**

Nitric oxide (NO) was prepared by treating sulfuric acid (3.6 M) solution with sodium nitrite solution (7.3M) and its stock solution (2.0 mM) was prepared by bubbling NO into deoxygenated deionized water for 30 min

### **ROO•**

ROO• was generated from 2,2'-azobis (2-amidinopropane) dihydrochloride. AAPH (2, 2' azobis (2-amidinopropane) dihydrochloride, 1 M) was added into deionizer water, and then stirred at 37 °C for 30 min;

### **•O<sub>2</sub>**

Superoxide was generated from KO<sub>2</sub>. KO<sub>2</sub> and 18-crown-6 ether (2.5 eq) was dissolved in DMSO to afford a 0.25 M solution.

### **•HO**

Hydroxyl radical was generated by the Fenton reaction. To prepare •OH solution, hydrogen peroxide (H<sub>2</sub>O<sub>2</sub>, 10 eq) was added to Fe(ClO<sub>4</sub>)<sub>2</sub> in deionised water.

### **ONOO•**

Simultaneously, 0.6 M KNO<sub>2</sub>, 0.6 M in HCl, 0.7 M in H<sub>2</sub>O<sub>2</sub> was added at to a 3 M NaOH solution at 0 °C. The concentration of peroxynitrite was estimated by using extinction co-efficient of 1670 cm<sup>-1</sup>M<sup>-1</sup> at 302 nm in 0.1 M sodium hydroxide aqueous solutions

### **•OCl**

The concentration of •OCl was determined from the absorption at 292 nm ( $\epsilon = 350 \text{ M}^{-1}\text{cm}^{-1}$ ).

### **H<sub>2</sub>O<sub>2</sub>**

The concentration of H<sub>2</sub>O<sub>2</sub> was determined from the absorption at 240 nm ( $\epsilon = 43.6 \text{ M}^{-1}\text{cm}^{-1}$ ).

## 2. Fluorescence analysis

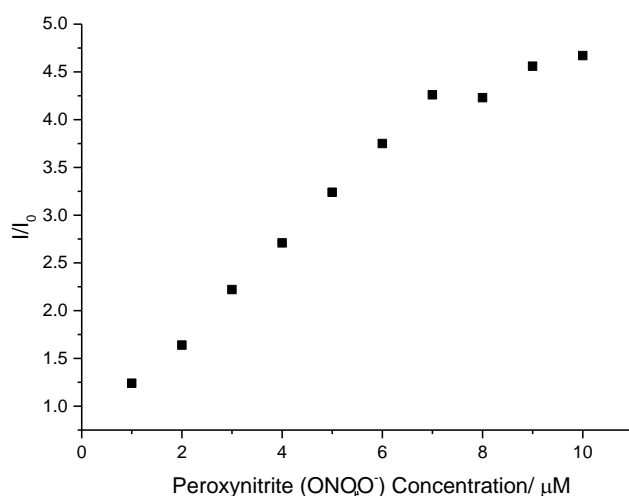

**Fig S1:** Fluorescence intensity changes ( $I/I_0$ ) for probe **3** ( $0.25 \mu\text{M}$ ) with increasing concentrations of peroxynitrite ( $\text{ONOO}^-$ )  $\lambda_{\text{ex}}$  400 nm/  $\lambda_{\text{em}}$  461 nm in pH 8.2 buffer solution [52 wt% methanol]. each measurement was made after 1 minute.

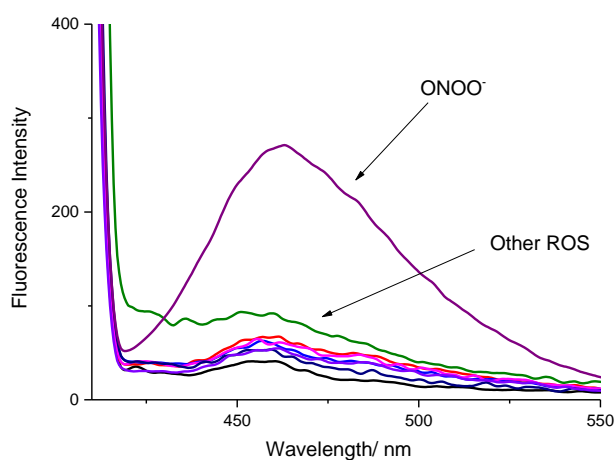

**Fig S2:** Fluorescence spectra of probe **3** ( $0.25 \mu\text{M}$ ) in the presence of various ROS/RNS:  $\text{ONOO}^-$  ( $10 \mu\text{M}$ , 1 min),  $\text{OCl}^-$  ( $100 \mu\text{M}$ , 30 min),  $\text{H}_2\text{O}_2$  ( $100 \mu\text{M}$ , 30 min),  $\text{ROO}^-$  ( $100 \mu\text{M}$ , 30 min),  $\text{NO}$  ( $100 \mu\text{M}$ , 1 min)  $\text{O}_2^-$  ( $100 \mu\text{M}$ , 1 min),  $\text{OH}^\cdot$  ( $100 \mu\text{M}$ , 1 min)  $\lambda_{\text{ex}}$  400 nm in pH 8.2 buffer solution [52 wt% methanol].

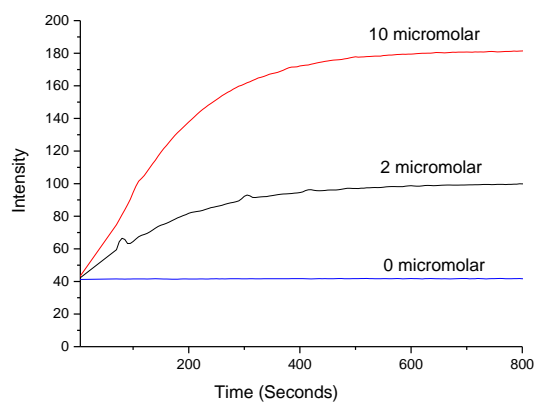

**Fig S3:** Fluorescence intensity changes for probe **3** (0.25  $\mu\text{M}$ ) as a function of time (Seconds) with increasing concentrations of  $\text{ONOO}^-$  (0, 2, 10  $\mu\text{M}$ ),  $\lambda_{\text{ex}}$  400nm,  $\lambda_{\text{em}}$  460 nm in pH 8.2 buffer solution [52 wt% methanol].

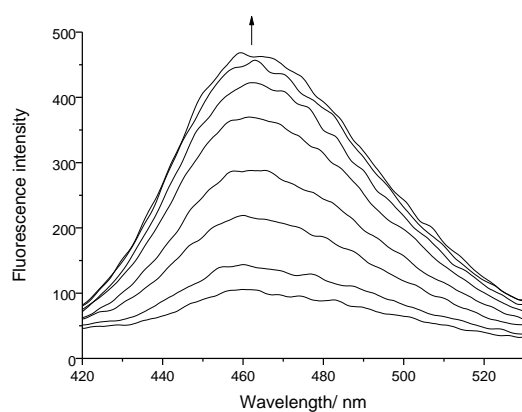

**Fig S4:** Fluorescence spectra of probe **3** (0.5  $\mu\text{M}$ ) with the addition of hydrogen peroxide (0-14 mM),  $\lambda_{\text{ex}}$  400 nm in pH 8.2 buffer solution [52 wt% methanol] each measurement was made after 30 minutes.

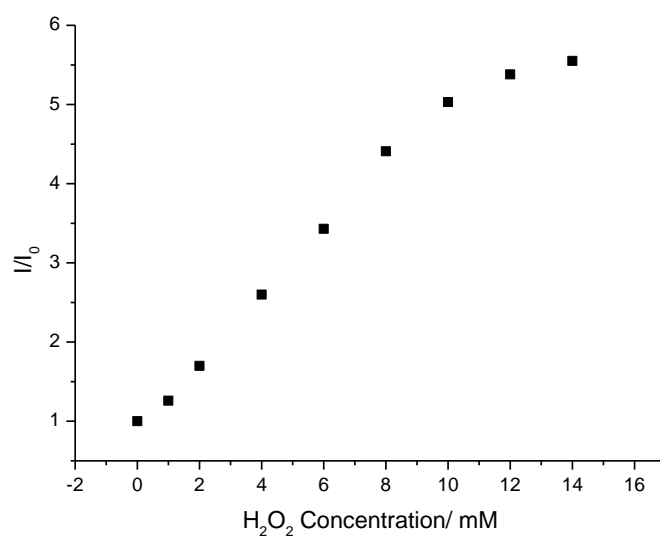

**Fig S5:** Fluorescence intensity changes ( $I/I_0$ ) for probe **3** ( $0.5\ \mu\text{M}$ ) with increasing concentrations of hydrogen peroxide ( $\text{H}_2\text{O}_2$ )  $\lambda_{\text{ex}}$  400 nm/  $\lambda_{\text{em}}$  461 nm in pH 8.2 buffer solution [52 wt% methanol] each measurement was made after 30 minutes.

### 3. UV analysis

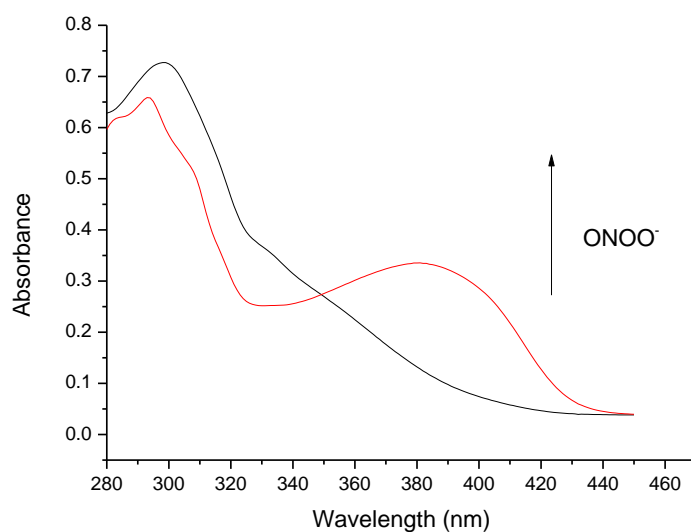

**Fig S6:** UV spectra of probe **3** ( $10\ \mu\text{M}$ ), with and without  $\text{ONOO}^-$  in pH 8.2 buffer solution [52 wt% methanol].

#### 4. Cell images and viability

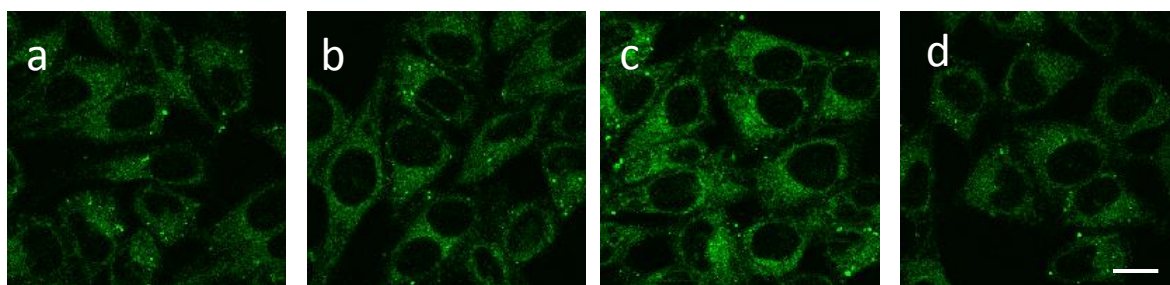

**Fig S7:** Fluorescence property in the live cell. HeLa cells were incubated with 20  $\mu\text{M}$  probe **3** for 30 min and washed with DPBS and added (a) 0, (b) 30, (c) 100  $\mu\text{M}$  ONOO- and (d) after pretreatment with 100  $\mu\text{M}$  ebselen, add 100  $\mu\text{M}$  ONOO- for 30 min. Fluorescence images were acquired by confocal microscopy.  $\lambda_{\text{ex}}$ . 473 nm/  $\lambda_{\text{em}}$  490 – 590 nm. Scale bar: 10  $\mu\text{m}$

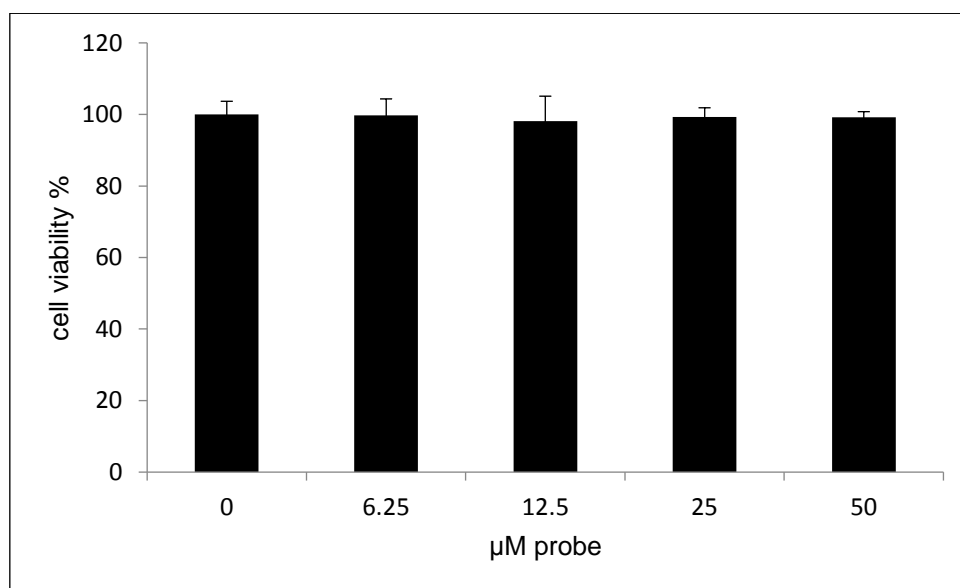

**Fig S8:** HeLa cells were incubated with each concentration of probe for 24hr. Cell viability was assayed by MTT test. Results are expressed as mean  $\pm$  standard deviation of three independent experiments.

## 5. Experimental

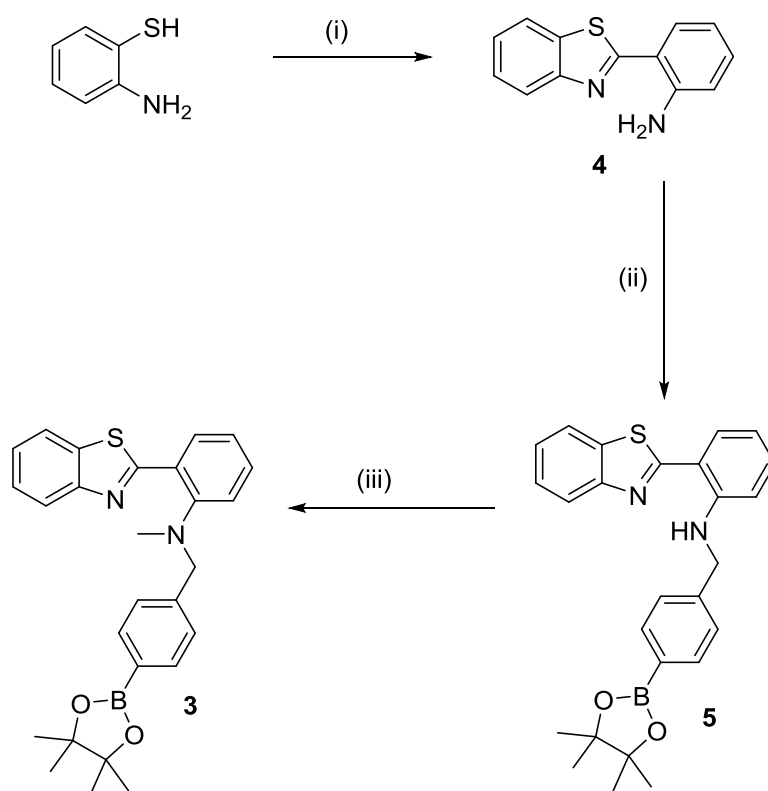

**Scheme S1:** (i) Isatoic anhydride, NaOAc, AcOH, 1.5 h, 72 % yield (ii) **4**, 4-(4,4,5,5-tetramethyl-1,3,2-dioxaborolan-2-yl)benzaldehyde, NaBH(OAc)<sub>3</sub>, AcOH, DCE, 16 h, 78 % yield (iii) **5**, NaCNBH<sub>3</sub>, Formaldehyde – 35 % in H<sub>2</sub>O, AcOH, MeCN, 17 h, 14 % yield.

## 2-(benzo[d]thiazol-2-yl)aniline (4)

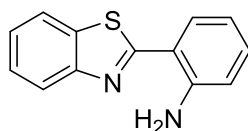

Isatoic anhydride (2.93 g, 15.27 mmol), 2-Aminothiophenol (2.55 mL, 20.37 mmol), Sodium acetate (1.2 g, 12.43 mmol) in AcOH (120 mL) was refluxed for 1.5 h under Argon. The reaction was cooled to rt and EtOAc (100 mL) was added and the solution was quenched with solid NaHCO<sub>3</sub>. The organic layer was washed with H<sub>2</sub>O (2 x 50 mL), brine (50 mL), dried (MgSO<sub>4</sub>) and concentrated *in vacuo* to afford the crude material. The crude product was purified via column chromatography 5:95 (EtOAc:Pet ether) to afford a cream solid (3.33 g, 14.7 mmol, 72 %). M.p. 123-127 °C. <sup>1</sup>H NMR (500MHz, CDCl<sub>3</sub>) δ<sub>H</sub> 7.97 (d, *J* = 8.8 Hz, 1 H, Ar*H*), 7.88 (d, *J* = 9.3 Hz, 1 H, Ar*H*), 7.71 (dd, *J* = 1.5, 7.8 Hz, 1 H, Ar*H*), 7.50 - 7.42 (m, 1 H, Ar*H*), 7.40 - 7.33 (m, 1 H, Ar*H*), 7.23 (ddd, *J* = 1.5, 7.2, 8.4 Hz, 1 H, Ar*H*), 6.79 (dd, *J* = 1.0, 8.3 Hz, 1 H, Ar*H*), 6.76 - 6.73 (m, 1 H, Ar*H*), 6.40 (br. s., 2 H, Ar-NH<sub>2</sub>); <sup>13</sup>C NMR (125.75 MHz, CDCl<sub>3</sub>) δ<sub>C</sub> 169.2, 153.7, 146.7, 133.3, 131.5, 130.3, 126.0, 124.8, 122.4, 121.2, 116.9, 116.8, 115.3; I.R (thin film) ν max (cm<sup>-1</sup>): 3461.97 (N-H); HRMS (ESI): *m/z* calculated for C<sub>13</sub>H<sub>10</sub>N<sub>2</sub>S: requires 227.0643 for [M+H]<sup>+</sup>, found 227.0637; requires 249.0462 for [M+Na]<sup>+</sup>, found 249.0443



**2-(benzo[d]thiazol-2-yl)-N-(4-(4,4,5,5-tetramethyl-1,3,2-dioxaborolan-2-yl)benzyl)aniline (5)**

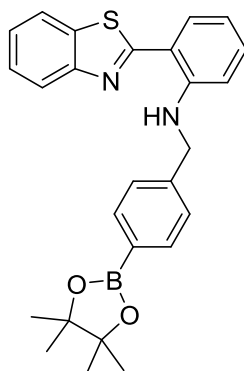

4-(4,4,5,5-tetramethyl-1,3,2-dioxaborolan-2-yl)benzaldehyde (1.18 g, 5.08 mmol) was added to a solution of **4** (0.72 g, 3.18 mmol) in DCE (10 mL) and AcOH (1.11 mL). The reaction mixture was stirred for 1 h before the addition of NaBH(OAc)<sub>3</sub> (1.75 g, 8.26 mmol). The reaction mixture was stirred for 24 h before being quenched with saturated NaHCO<sub>3</sub> solution. The organic layer was washed with H<sub>2</sub>O (3 x 50 mL), brine (50 mL), dried (MgSO<sub>4</sub>) and concentrated *in vacuo* to afford the crude product. The product was purified via column chromatography 10:90 (EtOAc:Pet ether) to afford a yellow oil (1.10 g, 2.49 mmol, 78 %). <sup>1</sup>H NMR (500MHz, CDCl<sub>3</sub>) δ<sub>H</sub> 9.52 (t, *J* = 5.4 Hz, 1 H, N-*H*), 7.93 (d, *J* = 7.8 Hz, 1 H, Ar*H*), 7.89 (d, *J* = 7.3 Hz, 1 H, Ar*H*), 7.83 (d, *J* = 7.8 Hz, 2 H, Ar*H*), 7.78 (dd, *J* = 1.5, 8.3 Hz, 1 H, Ar*H*), 7.27 - 7.20 (m, 1 H, Ar*H*), 6.74 - 6.68 (m, 2 H, Ar*H*), 4.65 (d, *J* = 5.4 Hz, 2 H, NHCH<sub>2</sub>Ar), 1.36 (s, 12 H, BPin); <sup>13</sup>C NMR (125.75 MHz, CDCl<sub>3</sub>) δ<sub>C</sub> 169.5, 153.5, 147.3, 142.5, 135.1, 133.1, 132.0, 130.6, 126.2, 126.0, 124.8, 122.3, 121.1, 115.6, 115.0, 111.9, 83.7, 47.3, 24.9; I.R (thin film) ν max (cm<sup>-1</sup>): 3282.94 (N-H); HRMS (ESI): *m/z* calculated for C<sub>26</sub>H<sub>27</sub>BN<sub>2</sub>O<sub>2</sub>S: requires 443.1965 for [M+H]<sup>+</sup>, found 443.2007

**2-(benzo[d]thiazol-2-yl)-N-methyl-N-(4-(4,4,5,5-tetramethyl-1,3,2-dioxaborolan-2-yl)benzyl)aniline (3)**

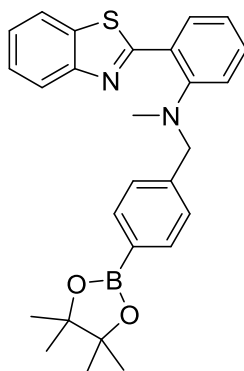

A solution of **5** (0.82 g, 1.85 mmol), formaldehyde – 37 % in H<sub>2</sub>O (1.3 mL, 18.54 mmol), AcOH (1.6 mL, 27.75 mmol) in MeCN (20 mL) was cooled to 0 °C before the portion wise addition of NaBH<sub>3</sub>CN (0.3 g, 4.81 mmol). The reaction was stirred for 24 h before being quenched with saturated NaHCO<sub>3</sub> solution. Ether (100 mL) was then added and the organic layer was washed with H<sub>2</sub>O (3 x 50 mL), brine (50 mL), dried (MgSO<sub>4</sub>) and concentrated *in vacuo* to afford the crude material. The product was purified *via* column chromatography 5:95 (EtOAc:Pet ether) to afford a pale green foam (0.12 g, 0.263 mmol, 14 %). <sup>1</sup>H NMR (500MHz, CDCl<sub>3</sub>) δ = 8.39 (dd, *J* = 2.0, 7.8 Hz, 1 H, Ar*H*), 8.10 (d, *J* = 8.3 Hz, 1 H, Ar*H*), 7.93 (d, *J* = 7.3 Hz, 1 H, Ar*H*), 7.79 (d, *J* = 7.8 Hz, 2 H, Ar*H*), 7.53 - 7.46 (m, 1 H, Ar*H*), 7.42 - 7.33 (m, 4 H, Ar*H*), 7.26 - 7.20 (m, 1 H, Ar*H*), 7.16 (d, *J* = 7.8 Hz, 1 H, Ar*H*), 4.20 (s, 2 H, CH<sub>3</sub>NCH<sub>2</sub>Ar), 2.66 (s, 3 H, CH<sub>3</sub>NCH<sub>2</sub>Ar), 1.36 (s, 12 H, BPin); <sup>13</sup>C NMR (125.75 MHz, CDCl<sub>3</sub>) δ = 165.0, 152.2, 151.4, 140.0, 136.7, 134.6, 130.9, 130.4, 129.0, 125.8, 124.9, 124.3, 122.9, 122.1, 121.4, 83.8, 61.1, 43.0, 24.9; HRMS (ESI): *m/z* calculated for C<sub>27</sub>H<sub>29</sub>BN<sub>2</sub>O<sub>2</sub>S: requires 479.1940 for [M+Na]<sup>+</sup>, found 479.1963

**2-(benzo[d]thiazol-2-yl)aniline (4)** (500 MHz, CDCl<sub>3</sub>)

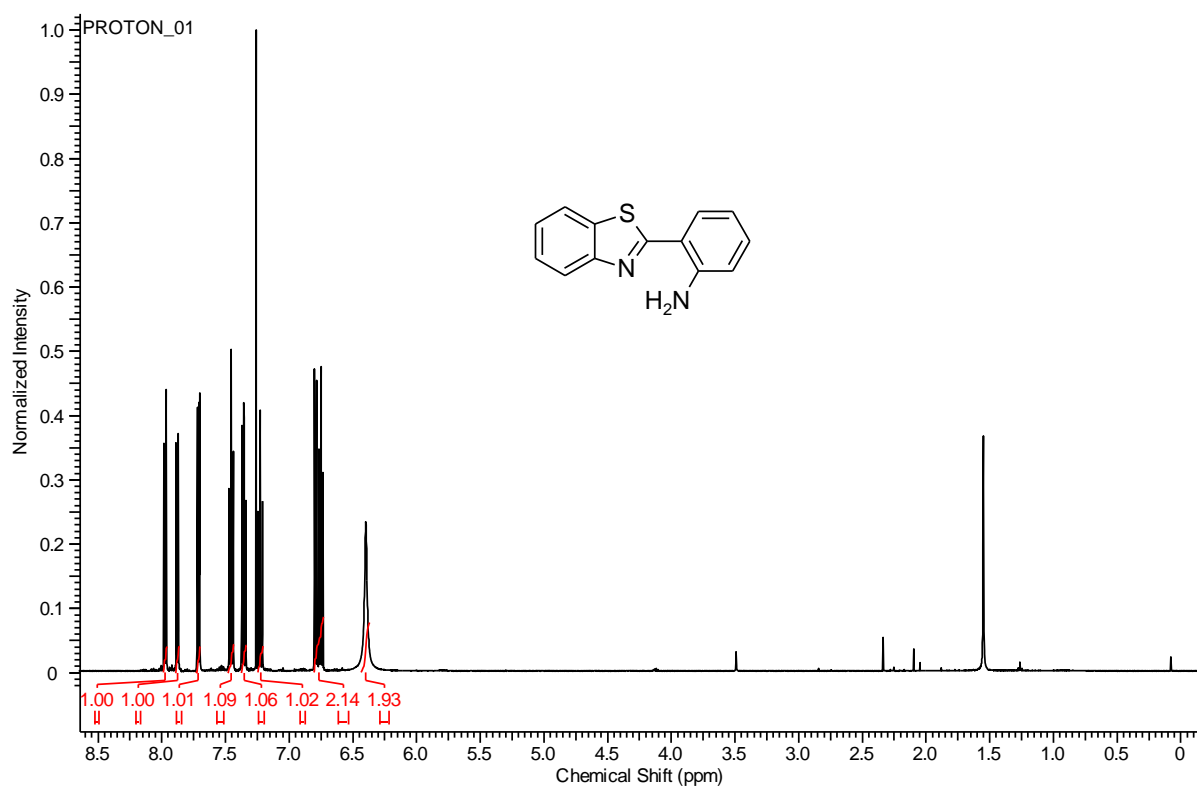

**2-(benzo[d]thiazol-2-yl)aniline (4)** (125.75 MHz, CDCl<sub>3</sub>)

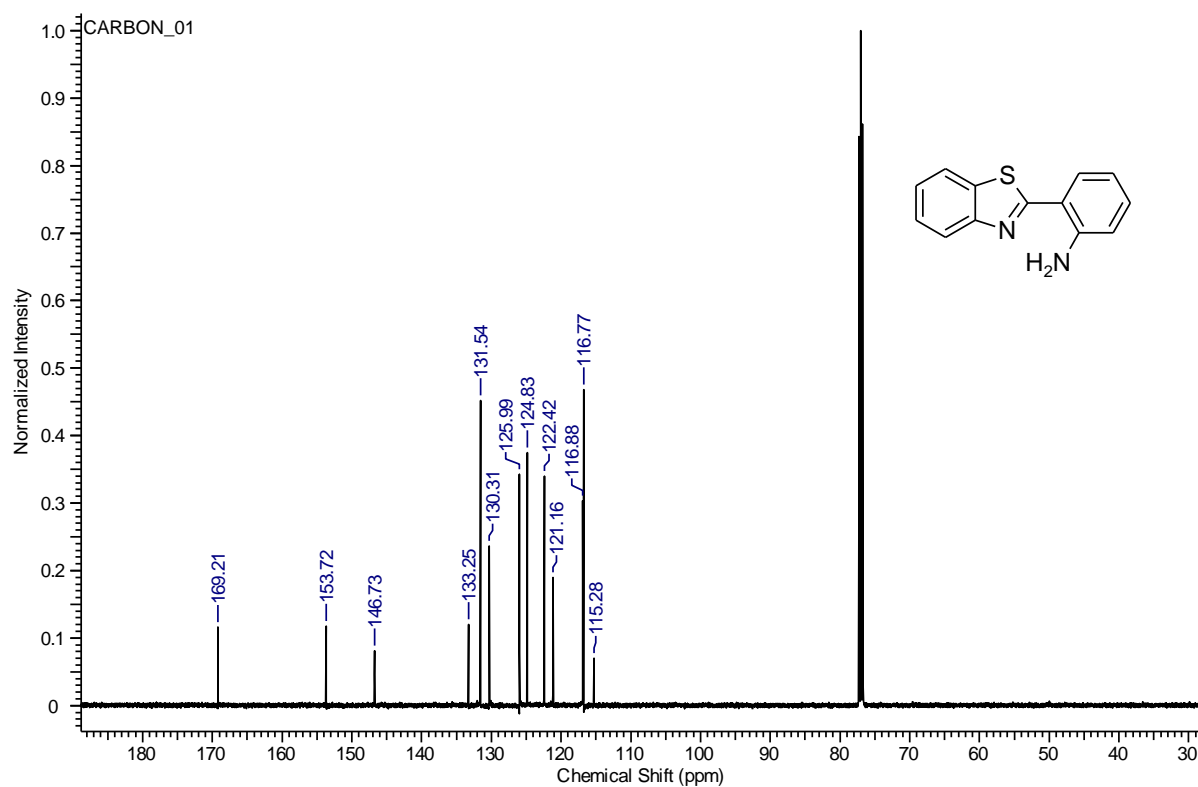

**2-(benzo[d]thiazol-2-yl)-N-(4-(4,4,5,5-tetramethyl-1,3,2-dioxaborolan-2-yl)benzyl)aniline (5)** (500 MHz, CDCl<sub>3</sub>)

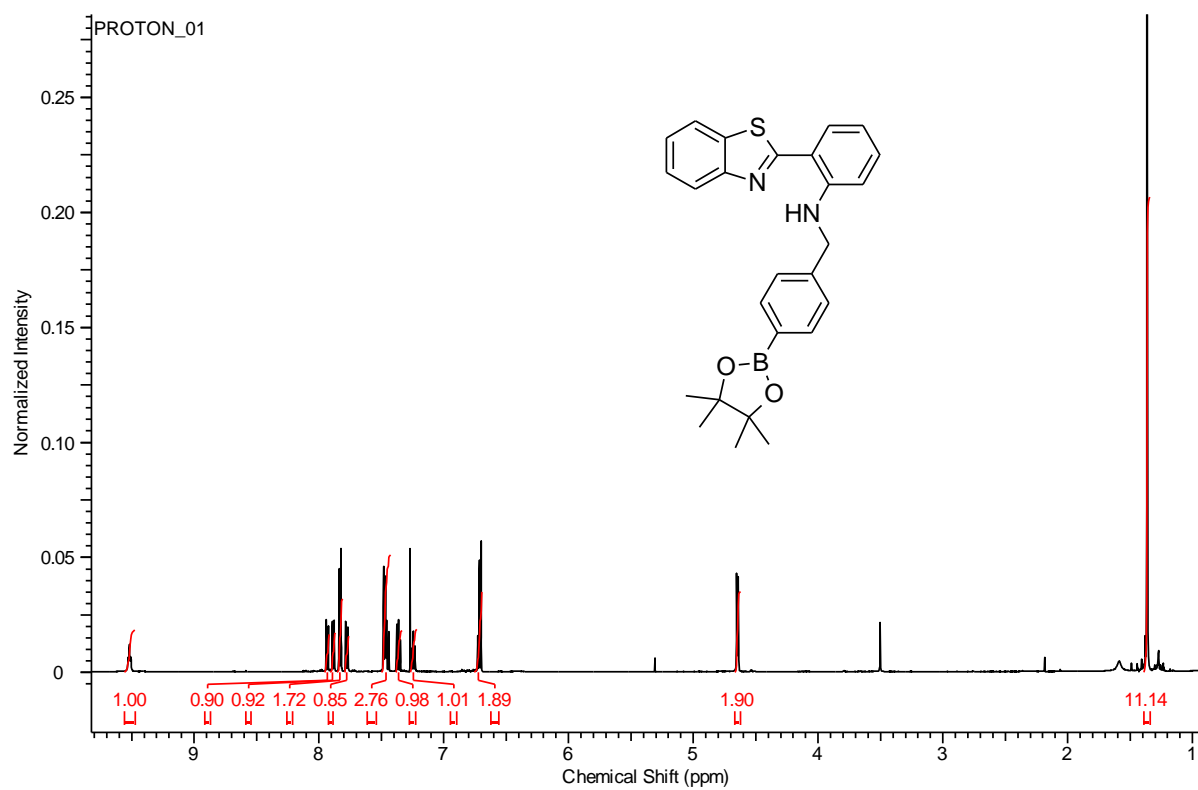

**2-(benzo[d]thiazol-2-yl)-N-(4-(4,4,5,5-tetramethyl-1,3,2-dioxaborolan-2-yl)benzyl)aniline (5)** (125.75 MHz, CDCl<sub>3</sub>)

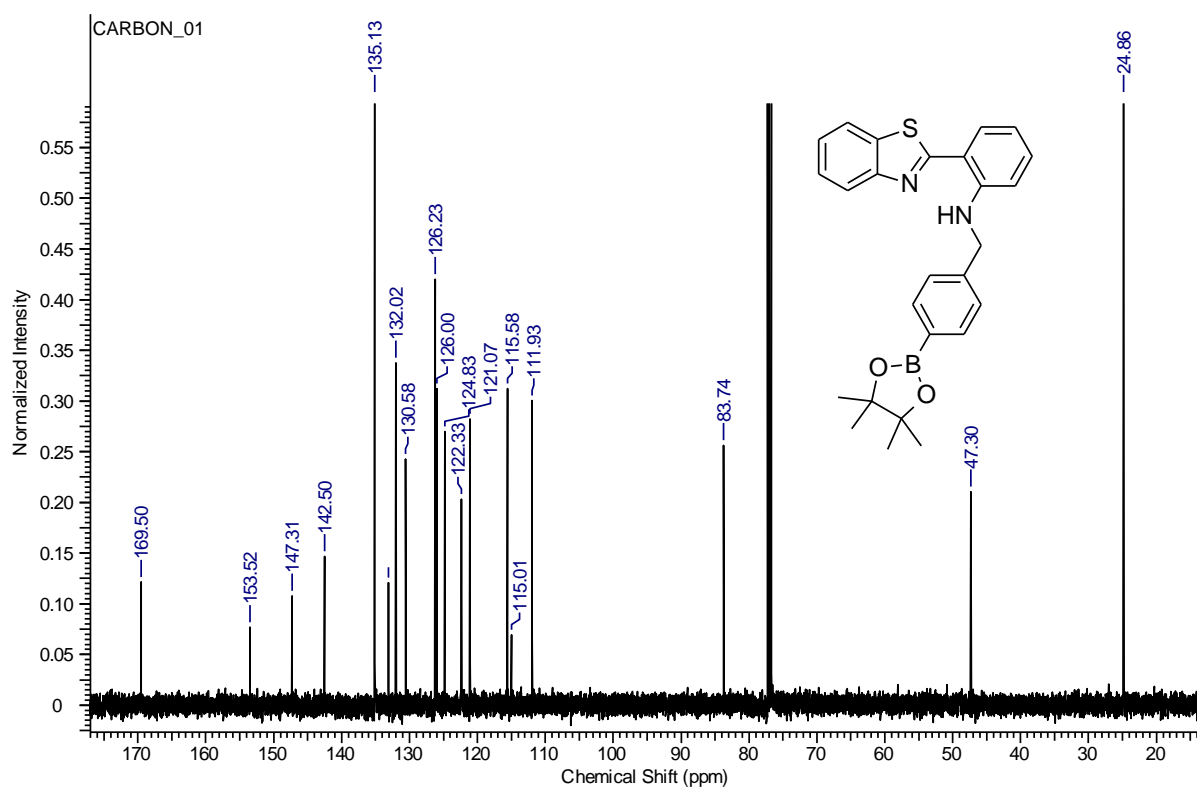

**2-(benzo[d]thiazol-2-yl)-N-methyl-N-(4-(4,4,5,5-tetramethyl-1,3,2-dioxaborolan-2-yl)benzyl)aniline (3)** (500 MHz, CDCl<sub>3</sub>)

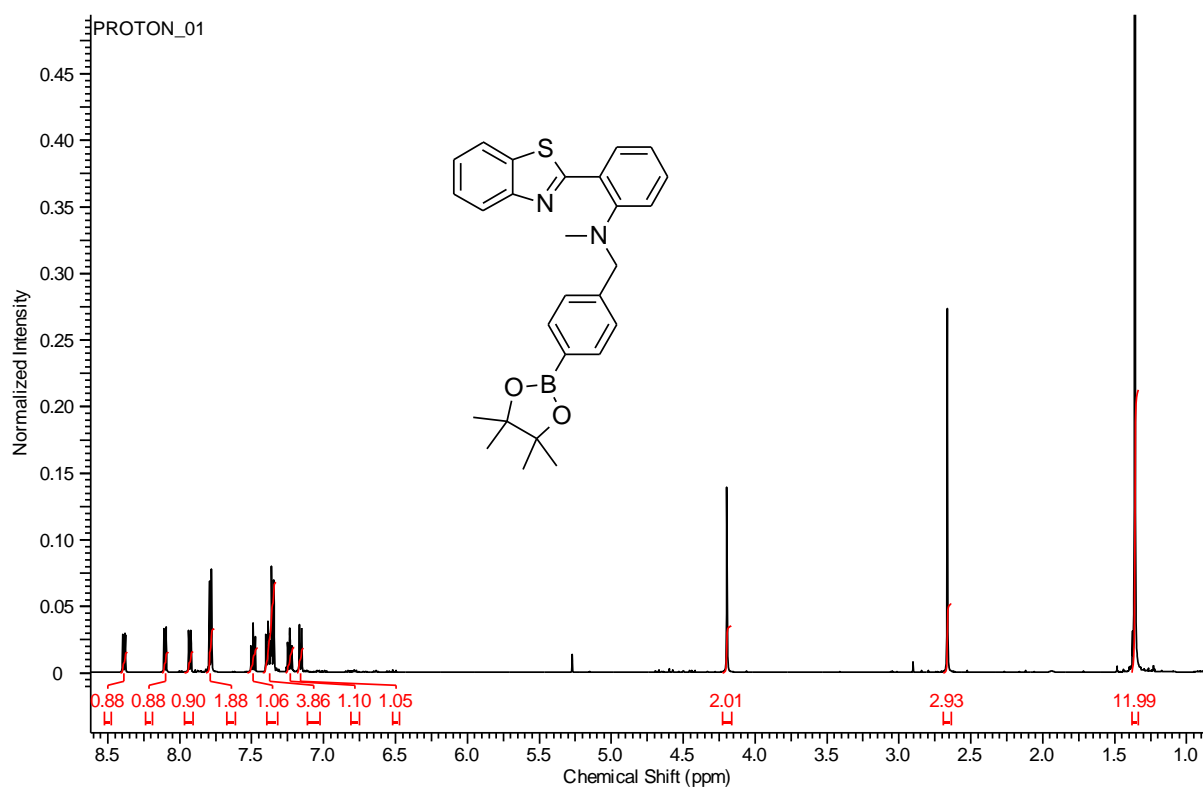

**2-(benzo[d]thiazol-2-yl)-N-methyl-N-(4-(4,4,5,5-tetramethyl-1,3,2-dioxaborolan-2-yl)benzyl)aniline (3)** (125.75 MHz, CDCl<sub>3</sub>)

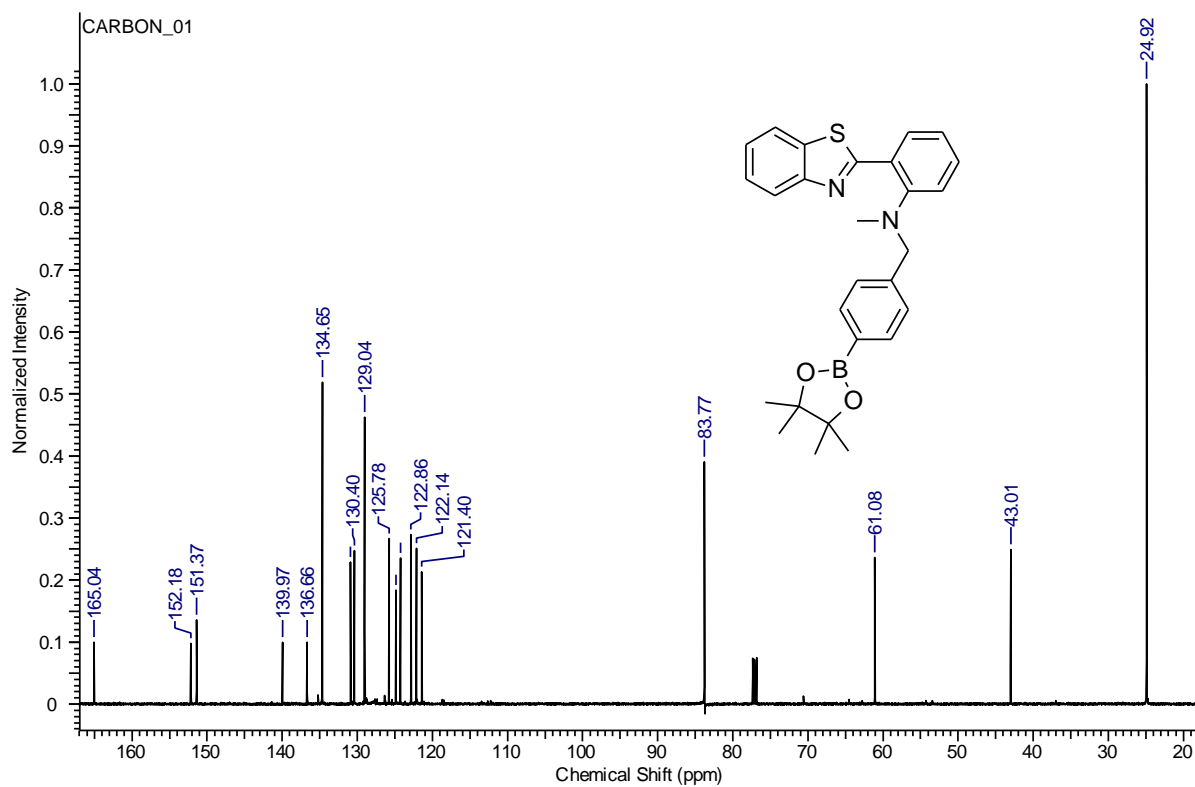

Supplement: c6cc06829d1.pdf [file c6cc06829d1.pdf]
